# Supplementary figures and images for: Development and pilot testing of HEXORR: Hand EXOskeleton Rehabilitation Robot
Source: Springer Nature journal article supplement (doi:10.1186/1743-0003-7-36), 2010-07-28

**A**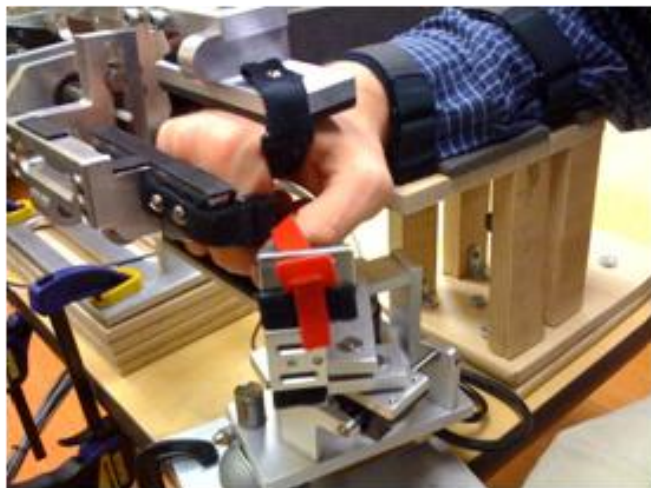**B**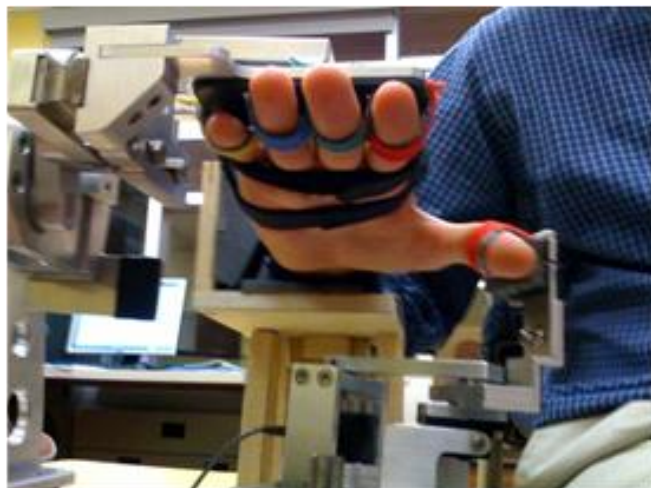**C**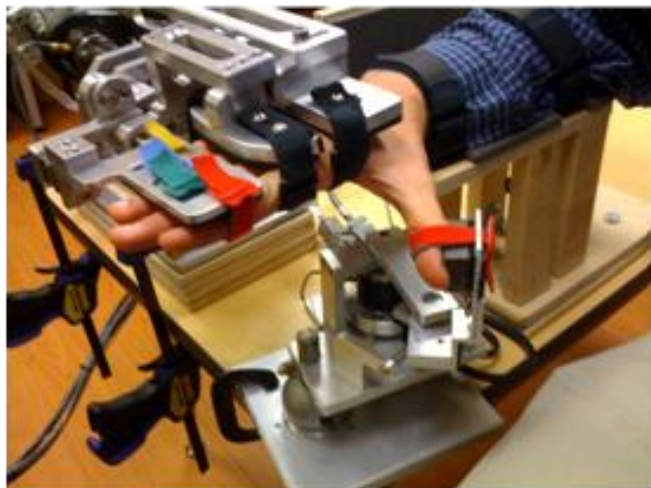**D**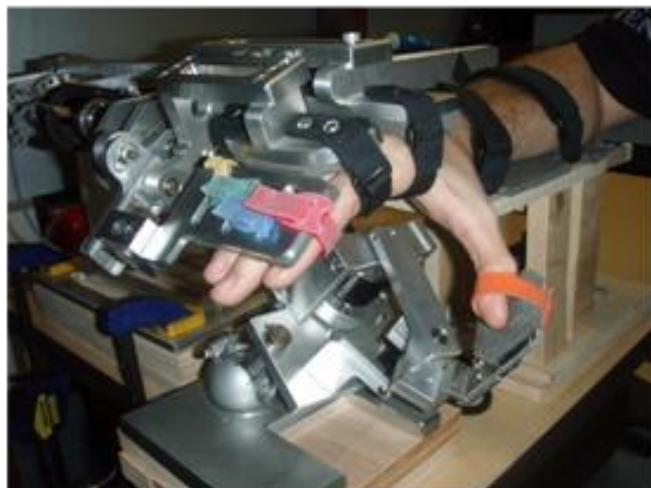

Supplement: 12984_2009_243_MOESM1_ESM.pdf [file 12984_2009_243_MOESM1_ESM.pdf]
